# Supplementary material for: Financial incentives to stop smoking: Potential financial consequences of different reward schedules
Source: PubMed Central journal article supplement (PMC11241474; doi:10.18332/tpc/190617), 2024-07-12
Supplement: TPC-10-30-s1.pdf [file TPC-10-30-s1.pdf]

**Table S1.** Age-specific smoking quit rates for a cohort of 3,500 individuals obtained from QuitManager data 2021-2022

| <b>Age group</b>         | <b>%</b> |
|--------------------------|----------|
| <b>Enter programme</b>   |          |
| 18-49 years              | 48.8%    |
| 50-59 years              | 22.0%    |
| 60-older                 | 29.2%    |
| <b>4 wks smoke free</b>  |          |
| 18-49 years              | 25.2%    |
| 50-59 years              | 11.1%    |
| 60-older                 | 16.8%    |
| <b>12 wks smoke free</b> |          |
| 18-49 years              | 17.1%    |
| 50-59 years              | 7.5%     |
| 60-older                 | 12.2%    |
| <b>52 wks smoke free</b> |          |
| 18-49 years              | 7.5%     |
| 50-59 years              | 3.4%     |
| 60-older                 | 5.9%     |

**Table S2.** Sex-specific smoking quit rates for a cohort of 3,500 individuals obtained from QuitManager data 2021-2022

| <b>Sex</b>               | <b>%</b> |
|--------------------------|----------|
| <b>Enter programme</b>   |          |
| Female                   | 55.6%    |
| Male                     | 44.4%    |
| <b>4 wks smoke free</b>  |          |
| Female                   | 29.4%    |
| Male                     | 23.7%    |
| <b>12 wks smoke free</b> |          |
| Female                   | 20.2%    |
| Male                     | 16.5%    |
| <b>52 wks smoke free</b> |          |
| Female                   | 8.9%     |
| Male                     | 7.9%     |

**Table S3.** Education-specific smoking quit rates for a cohort of 3,500 individuals obtained from QuitManager data 2021-2022

| <b>Education level</b>   | <b>%</b> |
|--------------------------|----------|
| <b>Enter programme</b>   |          |
| Low education            | 36.1%    |
| Medium education         | 46.4%    |
| High education           | 17.6%    |
| <b>4 wks smoke free</b>  |          |
| Low education            | 18.1%    |
| Medium education         | 25.9%    |
| High education           | 9.1%     |
| <b>12 wks smoke free</b> |          |
| Low education            | 12.0%    |
| Medium education         | 18.9%    |
| High education           | 5.8%     |
| <b>52 wks smoke free</b> |          |
| Low education            | 6.2%     |
| Medium education         | 8.2%     |
| High education           | 2.4%     |
